# Supplementary material for: Detection of Volatile Metabolites of Garlic in Human Breast Milk
Source: MDPI journal article supplement (doi:10.3390/metabo6020018), 2016-06-06
Supplement: s1 [file s1]

# Supplementary Materials: Detection of Volatile Metabolites of Garlic in Human Breast Milk

Laura Scheffler, Yvonne Sauermann, Gina Zeh, Katharina Hauf, Anja Heinlein, Constanze Sharapa and Andrea Buettner

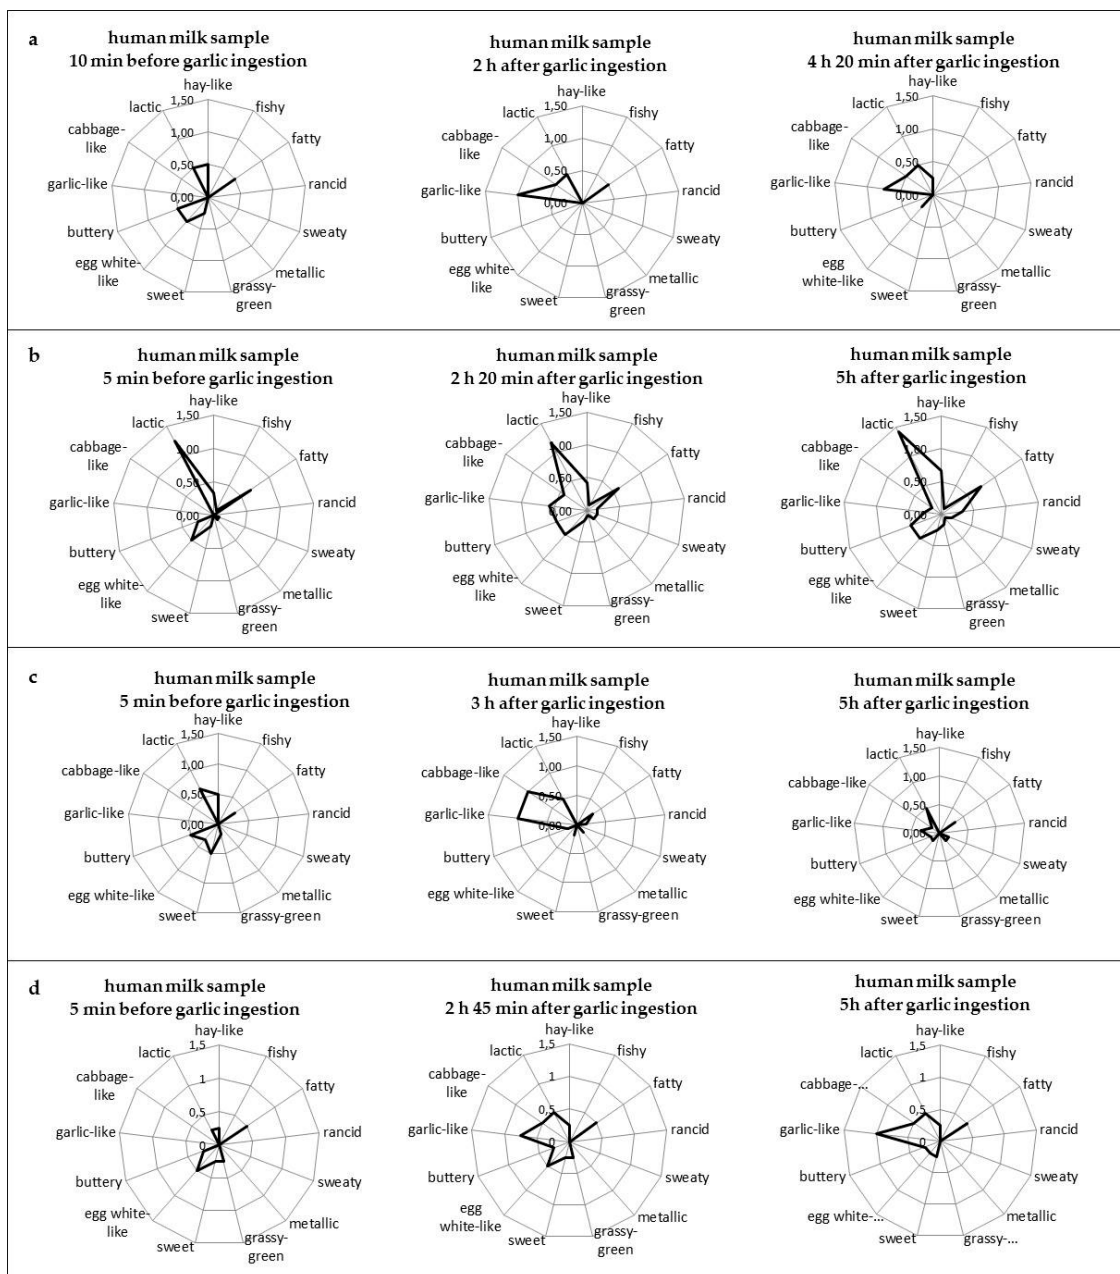

Figure S1. Cont.

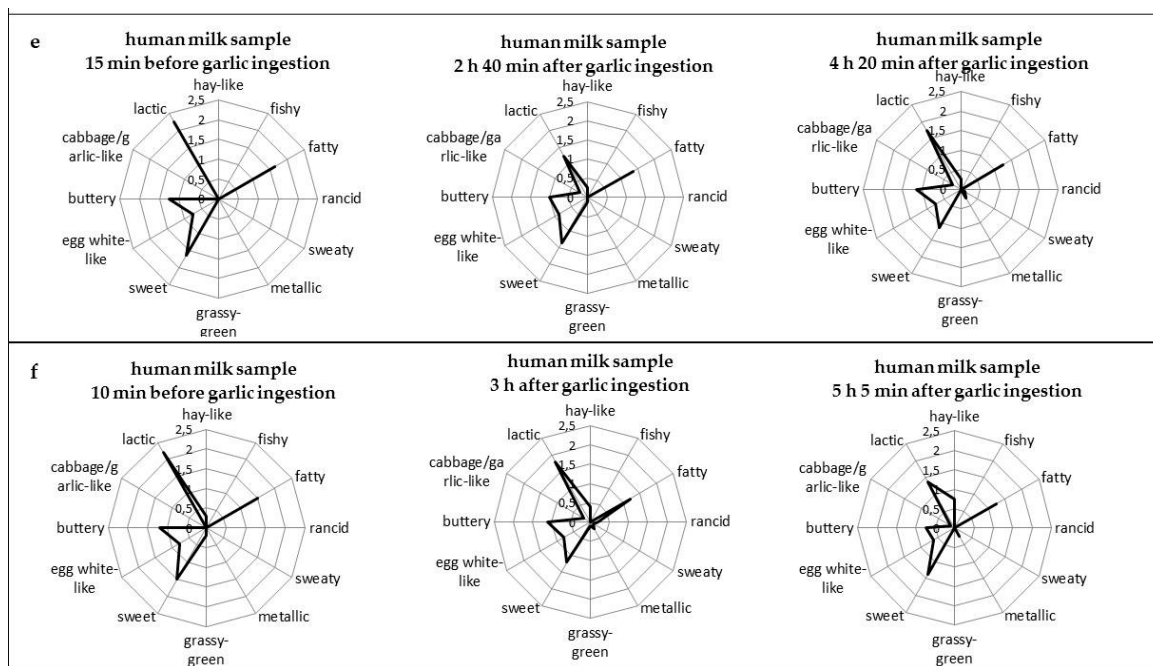

Figure S1. Aroma profiles of human milk samples of test persons (a–f).

Table S1. Dietary record-test person a.

| Day of Dietary Record | Type of Meal | Food                              | Beverages                       |
|-----------------------|--------------|-----------------------------------|---------------------------------|
| Day 1                 | break-fast   | cereal                            | coffee                          |
|                       | S1           | apple                             | fennel-anis-caraway-tea         |
|                       | lunch        | pasta with cheese sauce           | coffee, water                   |
|                       | S2           | apple, banana                     |                                 |
| Day 2                 | dinner       | bread with cheese                 | water                           |
|                       | S3           |                                   |                                 |
|                       | break-fast   | cereal                            | coffee, fennel-anis-caraway-tea |
|                       | S1           | apple                             |                                 |
| Sampling Day          | lunch        | semolina porridge with berries    | coffee, water                   |
|                       | S2           | apple, chocolate cake             |                                 |
|                       | dinner       | bread, pretzel with cheese, aspic | water                           |
|                       | S3           |                                   |                                 |

S1, S2, S3: Snacks.

**Table S2.** Dietary record-test person *b*.

| Day of Dietary Record | Type of Meal | Food                                                                                                      | Beverages  |
|-----------------------|--------------|-----------------------------------------------------------------------------------------------------------|------------|
| Day 1                 | break-fast   | cereal with fruits, amaranth and milk,<br>$\alpha$ -Thyroxin 50 mg                                        | cappuccino |
|                       | S1           |                                                                                                           | water      |
|                       | lunch        | tofu-stir-fried vegetables with rice and curry<br>sauce                                                   | water      |
|                       | S2           | chocolate croissant                                                                                       | cappuccino |
|                       | dinner       | sugared pancake with raisins with apple sauce                                                             | water      |
|                       | S3           | $\frac{1}{2}$ banana                                                                                      | water      |
| Day 2                 | break-fast   | cereal with fruits, amaranth and milk,<br>$\alpha$ -Thyroxin 50 mg                                        | cappuccino |
|                       | S1           | 1 banana                                                                                                  | water      |
|                       | lunch        | mozzarella-tomato with balsamic vinegar and<br>pretzel                                                    | water      |
|                       | S2           | $\frac{1}{2}$ Bavarian doughnut                                                                           | cappuccino |
|                       | dinner       | pasta with soy Bolognese sauce and salad<br>(cucumber, tomato, carrot, sunflower seeds,<br>pumpkin seeds) | water      |
|                       | S3           |                                                                                                           | water      |
| Sampling Day          | break-fast   | whole-grain bread with quark, currant-jelly,<br>honey and butter                                          | cacao      |
|                       | S1           |                                                                                                           |            |
|                       | lunch        | turkish spinach cake, endive salad with carrots                                                           | water      |
|                       | S2           |                                                                                                           |            |
|                       | dinner       |                                                                                                           |            |
|                       | S3           |                                                                                                           |            |

S1, S2, S3: Snacks.

**Table S3.** Dietary record-test person *c*.

| Day of Dietary Record | Type of Meal | Food                                                | Beverages          |
|-----------------------|--------------|-----------------------------------------------------|--------------------|
| Day 1                 | break-fast   | cheese roll                                         | coffee             |
|                       | S1           |                                                     |                    |
|                       | lunch        | roll with chicken, salad and sauce (without garlic) | thyme tea, water   |
|                       | S2           |                                                     |                    |
| Day 2                 | dinner       | pasta with tomato sauce (mushrooms, tomatoes)       | water, apple juice |
|                       | S3           | chocolate                                           |                    |
|                       | break-fast   | cereal (grains, apple, milk)                        | coffee             |
| Day 2                 | S1           |                                                     |                    |
|                       | lunch        | cake with nuts, roll with herbs                     | thyme tea, water   |
|                       | S2           | rice pudding with cherries                          | coconut milk       |
|                       | dinner       | pasta with tomato sauce (mushrooms, tomatoes)       | water              |
|                       | S3           | potato chips                                        |                    |
| Sampling Day          | break-fast   | cereal (grains, apple, milk)                        | coffee, water      |
|                       | S1           |                                                     |                    |
|                       | lunch        | cheese roll                                         |                    |
|                       | S2           | chocolate                                           |                    |
|                       | dinner       |                                                     |                    |
|                       | S3           |                                                     |                    |

S1, S2, S3: Snacks.

**Table S4.** Dietary record-test person *d*.

| <b>Day of Dietary Record</b> | <b>Type of Meal</b> | <b>Food</b>                                             | <b>Beverages</b>   |
|------------------------------|---------------------|---------------------------------------------------------|--------------------|
| Day 1                        | break-fast<br>S1    | cereal with wild berries                                | blood orange juice |
|                              | lunch<br>S2         | bread and ham<br>chocolate                              |                    |
|                              | dinner<br>S3        | gratin                                                  | nursing tea        |
| Day 2                        | break-fast<br>S1    | cereal with wild berries                                | blood orange juice |
|                              | lunch<br>S2         | gratin                                                  | oriental, red tea  |
|                              | dinner<br>S3        | gratin, mandarins<br>cookies                            | good-night tea     |
| Sampling Day                 | break-fast<br>S1    | cereal with wild berries                                | blood orange juice |
|                              | lunch<br>S2         | gratin: zucchini, tomato, feta cheese, egg<br>chocolate |                    |
|                              | dinner<br>S3        |                                                         |                    |

S1, S2, S3: Snacks.

Table S5. Dietary record-test person *e*.

| Day of Dietary Record | Type of Meal | Food                                                                                     | Beverages                                                         |
|-----------------------|--------------|------------------------------------------------------------------------------------------|-------------------------------------------------------------------|
| Day 1                 | break-fast   | 3 slices rye-wheat bread, butter, Nutella, 2 apricots                                    | 1 tall cup of coffee with whole milk, 1 glass of ACE-spritzer     |
|                       | S1           |                                                                                          | 2 glasses of water                                                |
|                       | lunch        | polenta with stir-fried vegetables (zucchini, pepper, kohlrabi)                          | 1 glass of water                                                  |
|                       | S2           | carrot, nectarine and banana                                                             | 2 glasses of water                                                |
|                       | dinner       | 5 slices rye-wheat bread (1x with butter, 2x with liverwurst, 2x with cheese)            | 1 glass of water                                                  |
|                       | S3           |                                                                                          | 2 glasses of water, 1 glass of currant spritzer                   |
| Day 2                 | break-fast   | 3 slices rye-wheat bread, 1x liverwurst, 2x butter and marmalade, ½ apricot, ½ nectarine | 1 tall cup of coffee with whole milk, 1 glass of currant spritzer |
|                       | S1           |                                                                                          | 1 glass of water, 1 glass of currant spritzer                     |
|                       | lunch        | 3 slices rye-wheat bread with cheese, carrot                                             | 1 glass of water                                                  |
|                       | S2           | nectarine, apricot, Hanuta                                                               | 2 glasses of water                                                |
|                       | dinner       | whole-grain pasta with minced meat sauce (beef mince, tomato, pepper, peas), cheese      | 1 glass of water                                                  |
|                       | S3           | Hanuta, 2 Kinder-Schoko-Bons                                                             | 1 glass of water, 1 glass of tonic                                |
| Sampling Day          | break-fast   | 3 slices rye-wheat bread with Nutella, 1 apricot, ½ nectarine                            | 1 tall cup of coffee with whole milk, 2 glasses of water          |
|                       | S1           |                                                                                          | 2 glasses of water, 1 glass of apple spritzer                     |
|                       | lunch        | whole-grain pasta with minced meat sauce (beef mince, tomato, pepper, peas), cheese      | 1 glass of water                                                  |
|                       | S2           | Hanuta                                                                                   | 1 small cup of coffee with milk, 1 glass of water                 |
|                       | dinner       |                                                                                          |                                                                   |
|                       | S3           |                                                                                          |                                                                   |

S1, S2, S3: Snacks.

Table S6. Dietary record- test person f.

| Day of Dietary Record | Type of Meal | Food                                                                                                           | Beverages                                                      |
|-----------------------|--------------|----------------------------------------------------------------------------------------------------------------|----------------------------------------------------------------|
| Day 1                 | break-fast   | 3 slices rye-wheat bread                                                                                       | coffee with soy milk                                           |
|                       | S1           |                                                                                                                |                                                                |
|                       | lunch        | noodles with olive-tomato sauce (tomato purée, olives, basil, provençal herbs, olive oil, pizza soft cheese)   |                                                                |
|                       | S2           | trail mix, gummi bears                                                                                         |                                                                |
|                       | dinner       | hash browns with apple sauce                                                                                   |                                                                |
|                       | S3           |                                                                                                                |                                                                |
| Day 2                 | break-fast   | Alnatura breakfast puree with rice milk                                                                        | nursing tea (fenugreek, fennel, anise, caraway, lemon verbena) |
|                       | S1           |                                                                                                                |                                                                |
|                       | lunch        | eggplants with tomato sauce (according to the restaurant without onions and garlic, but with broth from Maggi) |                                                                |
|                       | S2           |                                                                                                                |                                                                |
|                       | dinner       | bread with margarine and ham, cucumber                                                                         |                                                                |
|                       | S3           | dark chocolate                                                                                                 |                                                                |
| Sampling Day          | break-fast   | vegan marble cake                                                                                              | coffee with soy milk, Fanta                                    |
|                       | S1           |                                                                                                                |                                                                |
|                       | lunch        | bread bun with butter, ham, tomato, cucumber                                                                   | water                                                          |
|                       | S2           |                                                                                                                | water                                                          |
|                       | dinner       |                                                                                                                |                                                                |
|                       | S3           |                                                                                                                |                                                                |

S1, S2, S3: Snacks.

**Table S7.** Time of sampling, garlic consumption and the respective amounts of the gathered samples.

| Subject              | Event              | Time  | Amount of Human Milk (g) |
|----------------------|--------------------|-------|--------------------------|
| test person <i>a</i> | 1st sample         | 9:00  | 437,953                  |
|                      | garlic consumption | 9:10  |                          |
|                      | 2nd sample         | 11:10 | 118,489                  |
|                      | 3rd sample         | 13:30 | 490,093                  |
| test person <i>b</i> | 1st sample         | 9:20  | 337,798                  |
|                      | garlic consumption | 9:25  |                          |
|                      | 2nd sample         | 11:45 | 277,028                  |
|                      | 3rd sample         | 14:30 | 154,362                  |
| test person <i>c</i> | 1st sample         | 9:05  | 159,959                  |
|                      | garlic consumption | 09:10 |                          |
|                      | 2nd sample         | 12:10 | 185,397                  |
|                      | 3rd sample         | 14:00 | 125,154                  |
| test person <i>d</i> | 1st sample         | 9:20  | 152,956                  |
|                      | garlic consumption | 9:25  |                          |
|                      | 2nd sample         | 12:10 | 131,801                  |
|                      | 3rd sample         | 14:20 | 261,274                  |
| test person <i>e</i> | 1st sample         | 9:40  | 436,317                  |
|                      | garlic consumption | 9:55  |                          |
|                      | 2nd sample         | 12:35 | 446,195                  |
|                      | 3rd sample         | 14:15 | 231,551                  |
| test person <i>f</i> | 1st sample         | 9:35  | 326,611                  |
|                      | garlic consumption | 9:45  |                          |
|                      | 2nd sample         | 12:45 | 95,967                   |
|                      | 3rd sample         | 14:50 | 112,297                  |
